# Supplementary material for: The prognostic impact of rheumatoid arthritis in sepsis: a population-based analysis
Source: PubMed Central journal article supplement — Acute Crit Care. 2022 Oct 6;37(4):533–42. doi: 10.4266/acc.2022.00787 (PMC9732185; doi:10.4266/acc.2022.00787), 2022-10-06
Supplement: acc-2022-00787-suppl1.pdf [file acc-2022-00787-suppl1.pdf]

**Supplementary Table 1.** International Classification of Diseases, ninth and tenth revisions, clinical modification (ICD-9-CM and ICD-10-CM) codes used to identify sites of infection

| Site of infection      | ICD-9-CM codes                                                                                                                                                                                                                 | ICD-10-CM codes                                                                                                                                                                                                                                       |
|------------------------|--------------------------------------------------------------------------------------------------------------------------------------------------------------------------------------------------------------------------------|-------------------------------------------------------------------------------------------------------------------------------------------------------------------------------------------------------------------------------------------------------|
| Respiratory            | 481x, 482x, 483x, 484x, 485x, 486x, 4870x, 4871x, 48801, 48802, 48811, 48812, 48881, 48882, 510x, 513x                                                                                                                         | J13x, J14x, J15x, J16x, J17x, J18x, B250, A3791, A221, B440, J860, J869, J85x                                                                                                                                                                         |
| Urinary                | 590x, 5990x                                                                                                                                                                                                                    | N110, N118, N10, N151, N2884, N2885, N2886, N12, N16, N159, N30x, N390                                                                                                                                                                                |
| Abdominal              | 003x, 008x, 540x, 541x, 542x, 5304x, 53086, 56201, 56203, 56211, 56213, 566x, 567x, 5695x, 56983, 5720x, 5750x, 5311x, 5312x, 5315x, 5316x, 5321x, 5322x, 5325x, 5326x, 5331x, 5332x, 5335x, 5336x, 5341x, 5342x, 5345x, 5346x | A02x, A03x, A05x, A08x, K35x, K36x, K37x, K65x, K67x, K68x, K223, K9432, K57x, K751, K61x, K630, K631, K750, K810, K812, K251, K252, K253, K255, K256, K257, K259, K261, K262, K263, K265, K266, K267, K281, K282, K285, K286, K271, K272, K275, K276 |
| Skin and soft tissues  | 6751x, 680x, 682x, 686x, 9985                                                                                                                                                                                                  | O91x, L02x, K122, L03x, L08x, K6811                                                                                                                                                                                                                   |
| Blood                  | 7907x, 5721x, 6733x                                                                                                                                                                                                            | R7881                                                                                                                                                                                                                                                 |
| Endocarditis           | 11281, 421x, 42490, 42491, 11504, 11594, 03642, 09884                                                                                                                                                                          | B376, I330, I39, I339, I38, I39, B394, B399, A5483                                                                                                                                                                                                    |
| Genital                | 615x, 6340x, 6350x, 636x, 6370x, 6380x, 6390x, 6466x, 6584x                                                                                                                                                                    | N71x, O045, O0487, N710, N711, N719, O035, O0387, O030, O0337, O035, O0045, O070, O0737, O080, O0882                                                                                                                                                  |
| Central nervous system | 320x, 322x, 324x, 325x                                                                                                                                                                                                         | G00x, G01, G03x, G042, G06x                                                                                                                                                                                                                           |
| Bone and joint         | 7710x, 730x                                                                                                                                                                                                                    | M00x, M86x                                                                                                                                                                                                                                            |
| Device-related         | 9966x                                                                                                                                                                                                                          | T8579XA, T80211x, T80212x, T80218x, T80219x                                                                                                                                                                                                           |
