# Supplementary material for: The prognostic impact of rheumatoid arthritis in sepsis: a population-based analysis
Source: PubMed Central journal article supplement — Acute Crit Care. 2022 Oct 6;37(4):533–42. doi: 10.4266/acc.2022.00787 (PMC9732185; doi:10.4266/acc.2022.00787), 2022-10-06
Supplement: acc-2022-00787-suppl8.pdf [file acc-2022-00787-suppl8.pdf]

**Supplementary Table 8.** Multivariable logistic regression without propensity adjustment for the association of rheumatoid arthritis with short-term mortality for the whole cohort: alternative modeling for the impact of missing gender data

| Modeling approach                                                       | Adjusted odds ratio (95% CI) | P-value |
|-------------------------------------------------------------------------|------------------------------|---------|
| Include only hospitalizations with gender data                          | 0.901 (0.849–0.956)          | <0.001  |
| Include hospitalizations with missing gender data as indicator variable | 0.880 (0.832–0.932)          | <0.001  |

CI: confidence interval.
