# Supplementary material for: The prognostic impact of rheumatoid arthritis in sepsis: a population-based analysis
Source: PubMed Central journal article supplement — Acute Crit Care. 2022 Oct 6;37(4):533–42. doi: 10.4266/acc.2022.00787 (PMC9732185; doi:10.4266/acc.2022.00787), 2022-10-06
Supplement: acc-2022-00787-suppl11.pdf [file acc-2022-00787-suppl11.pdf]

**Supplementary Table 11.** Multilevel multivariable logistic regression with propensity adjustment for the association of rheumatoid arthritis with short-term mortality among hospitalizations aged  $\geq 65$  years: alternative modeling for the impact of missing gender data

| Modeling approach                                                       | Adjusted odds ratio (95% CI) | P-value |
|-------------------------------------------------------------------------|------------------------------|---------|
| Include only hospitalizations with gender data                          | 0.874 (0.816–0.937)          | <0.001  |
| Include hospitalizations with missing gender data as indicator variable | 0.871 (0.815–0.932)          | <0.001  |

CI: confidence interval.
